# Supplementary material for: A high-density consensus map of barley linking DArT markers to SSR, RFLP and STS loci and agricultural traits
Source: PubMed Central journal article supplement (PMC1564146; doi:10.1186/1471-2164-7-206), 2006-08-12
Supplement: 1471-2164-7-206-S1.pdf [file 1471-2164-7-206-S1.pdf]

1H 2H 3H 4H 5H 6H 7H

Barque-73/CP171284-48

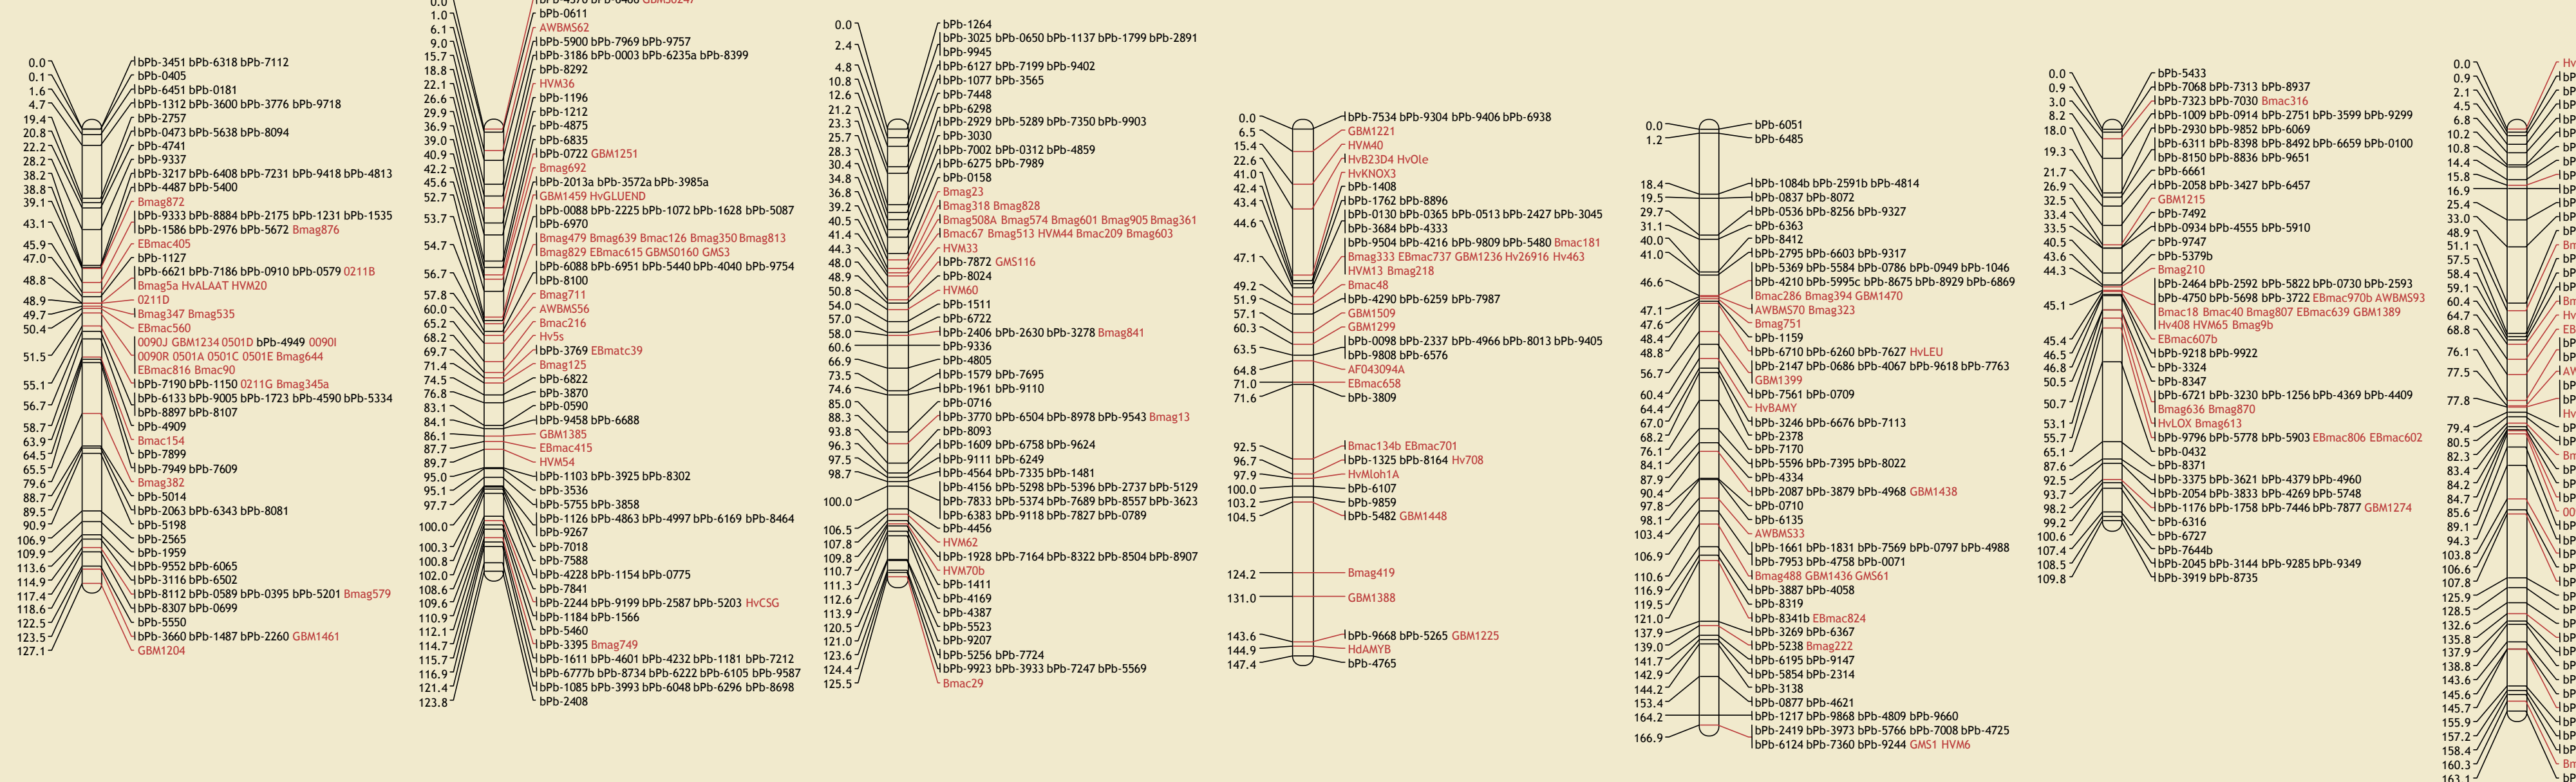

Clipper/Sahara

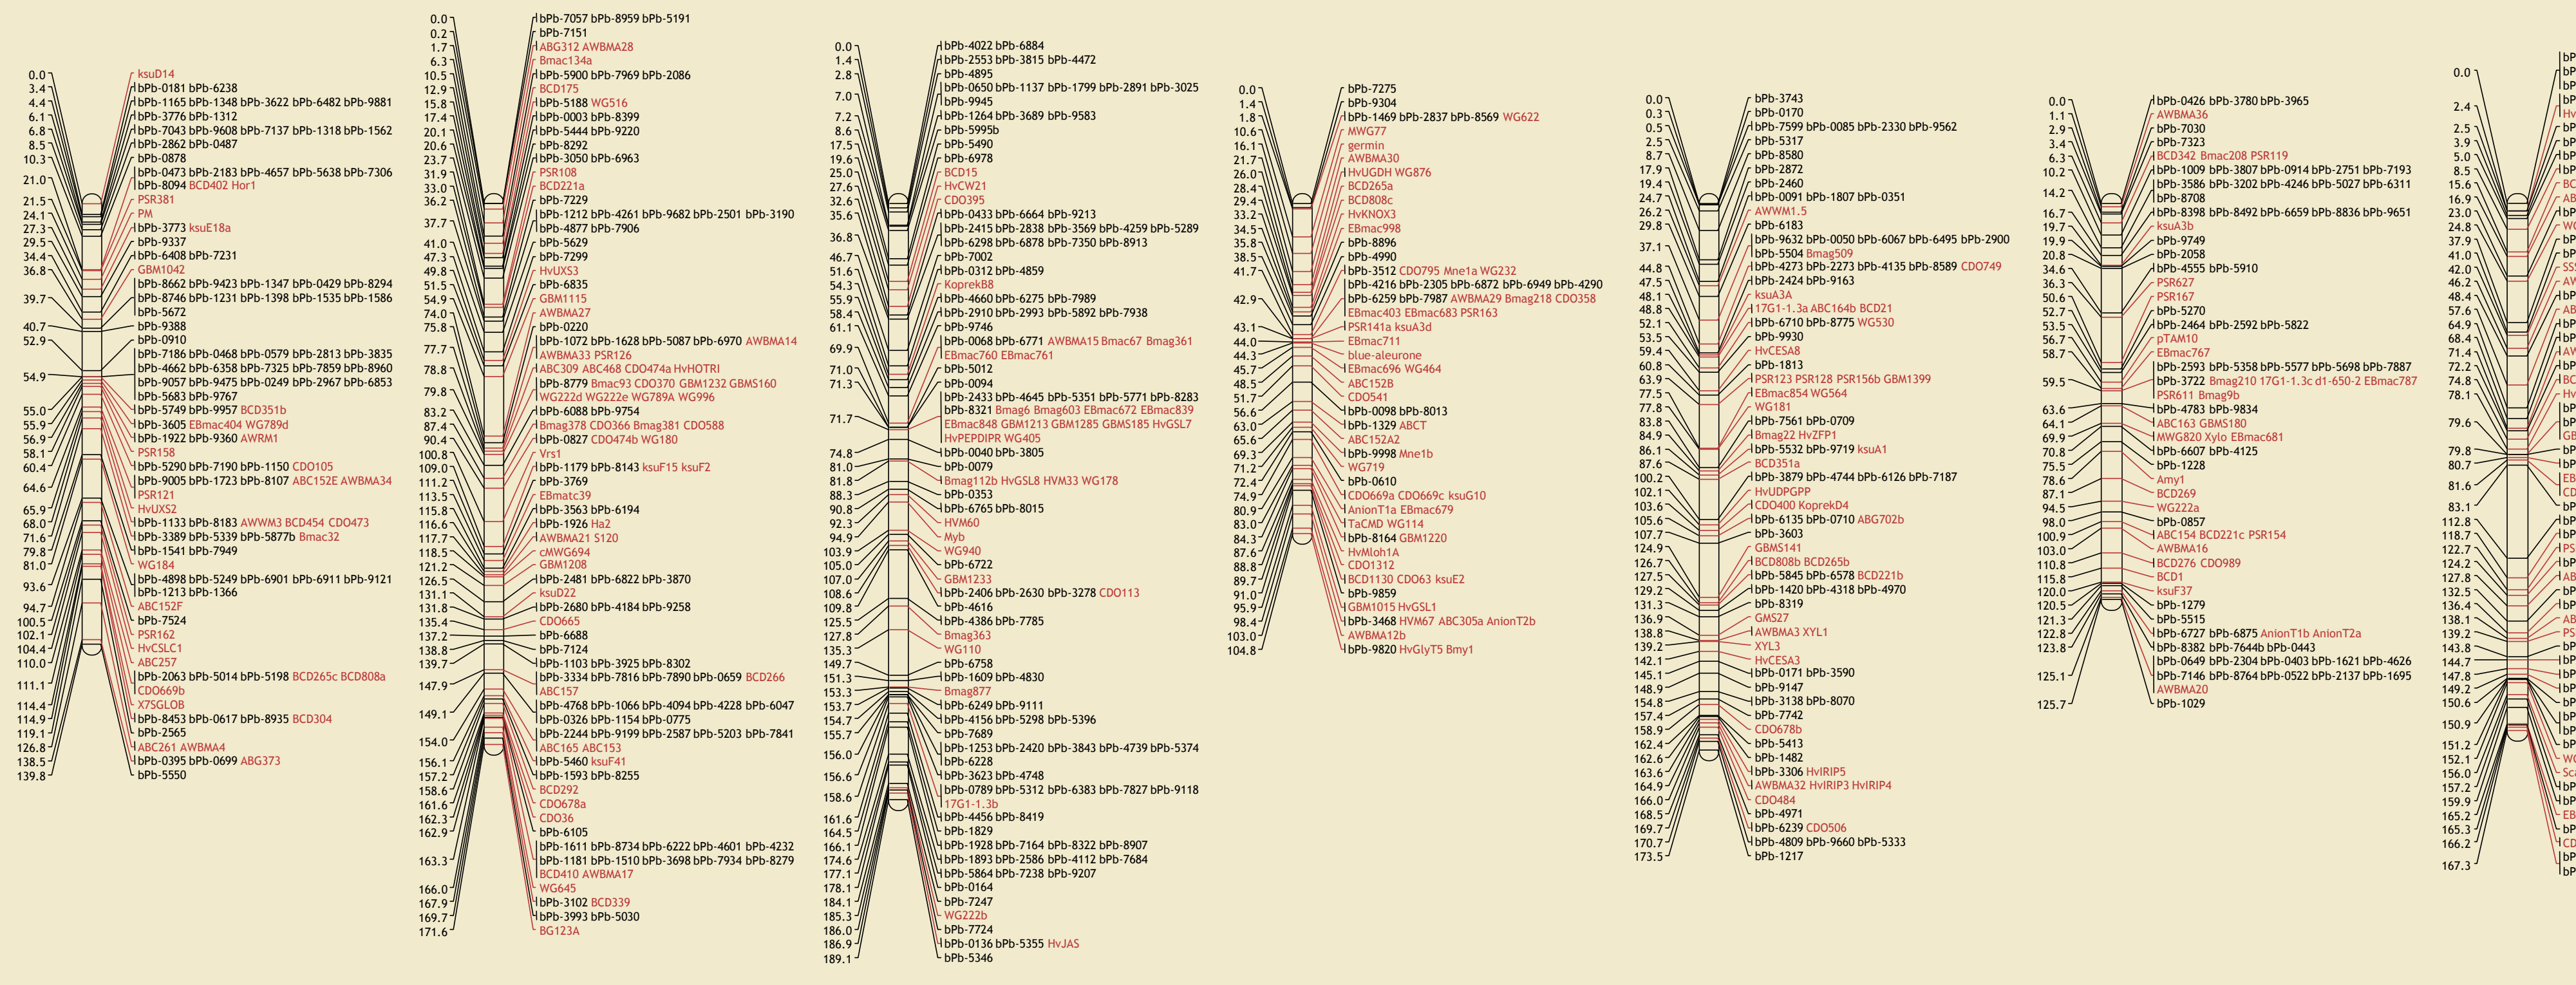

Dayton/Zhepi2

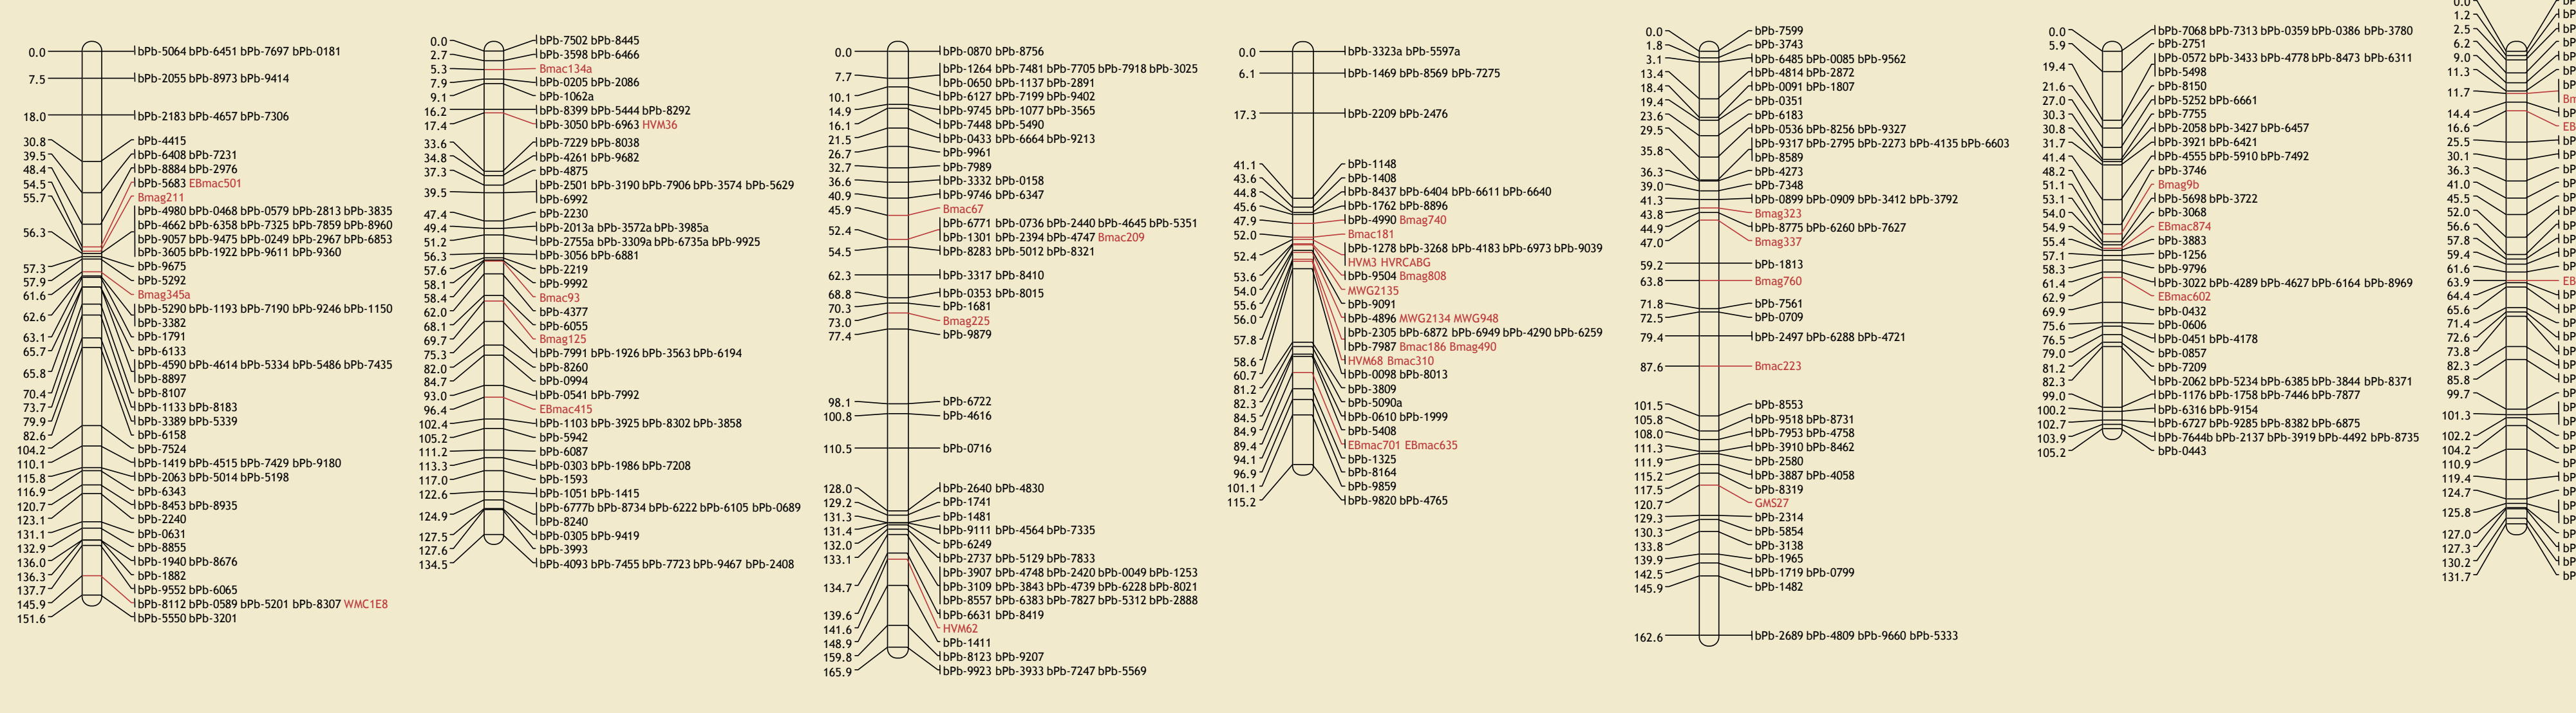

Foster/CI4196

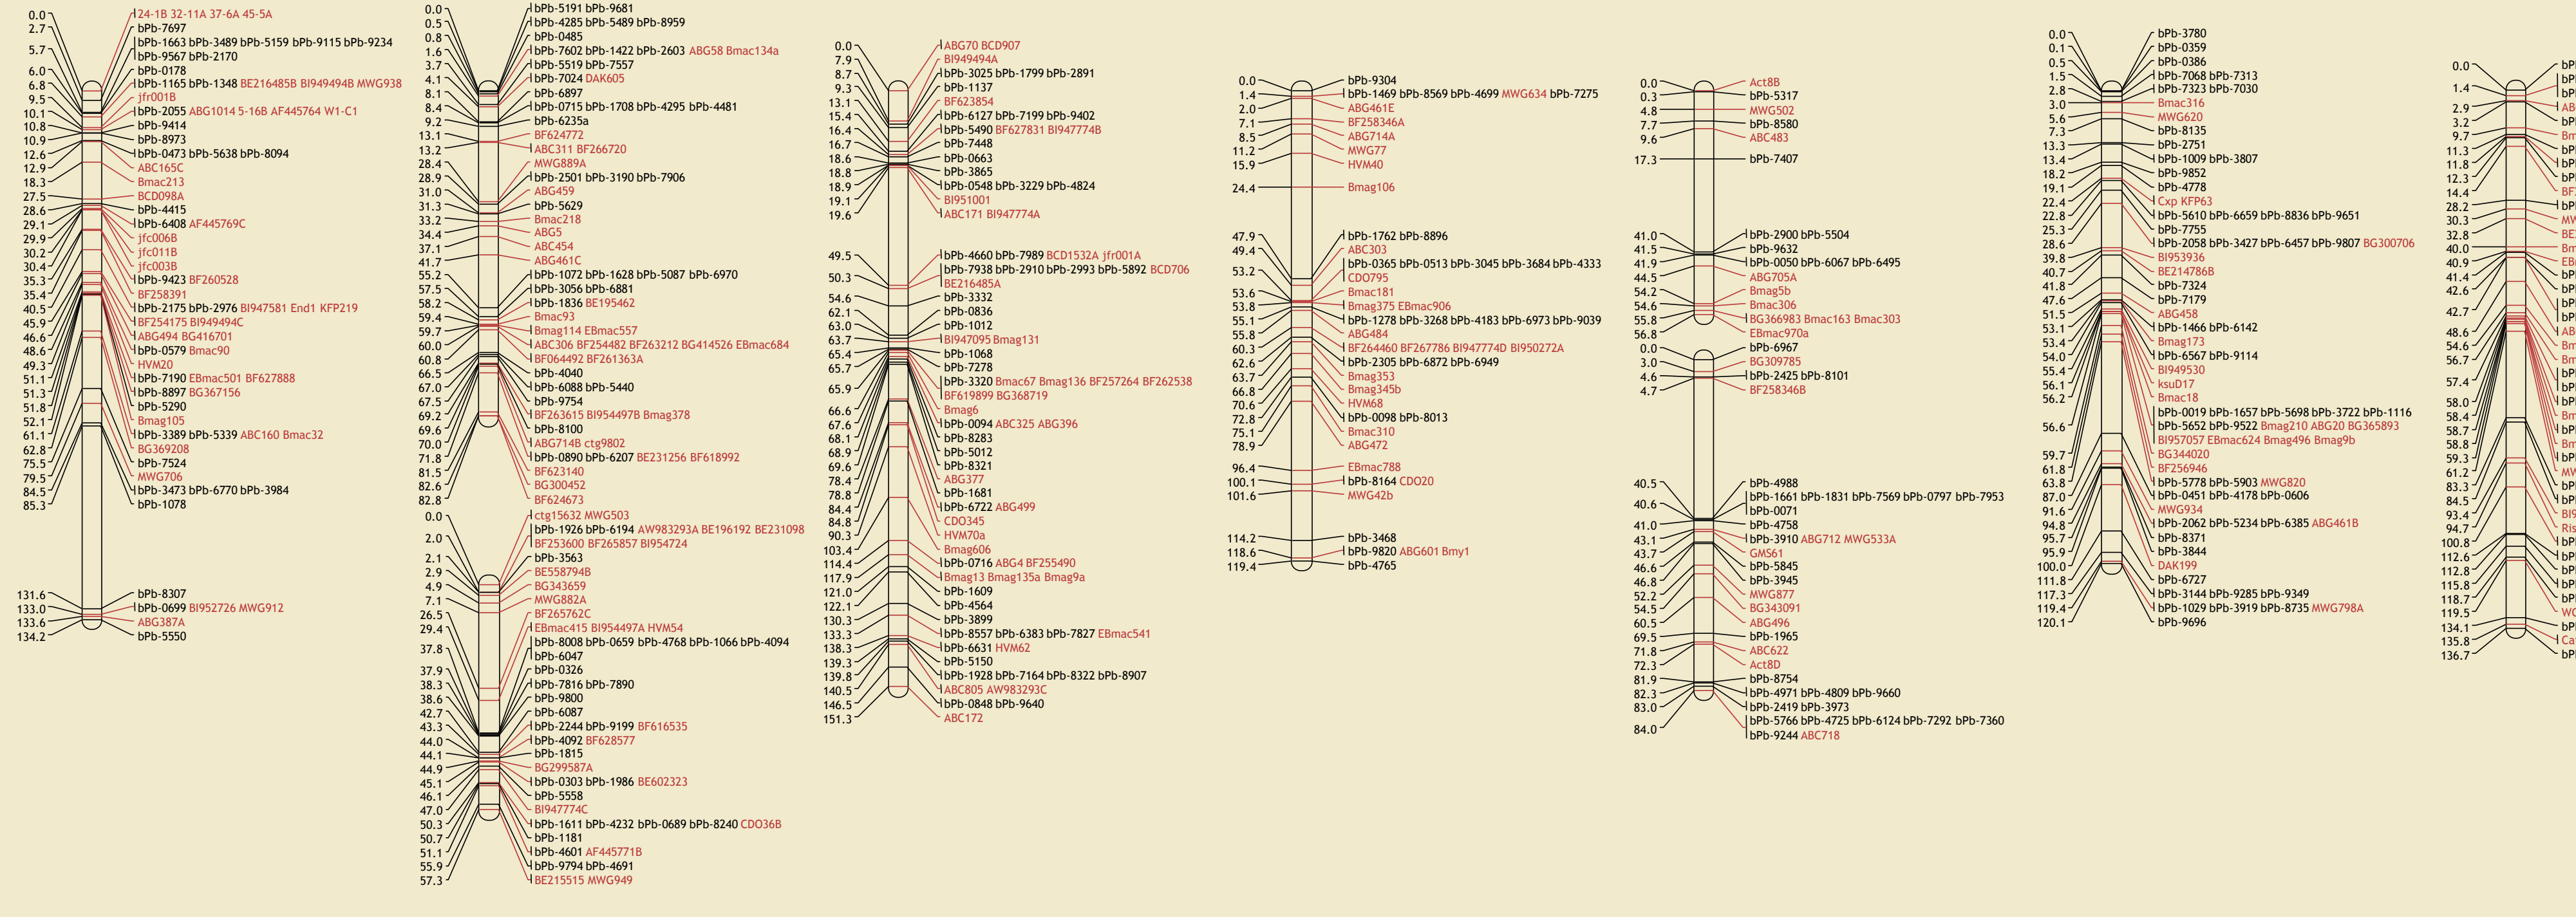

Steptoe/Morex

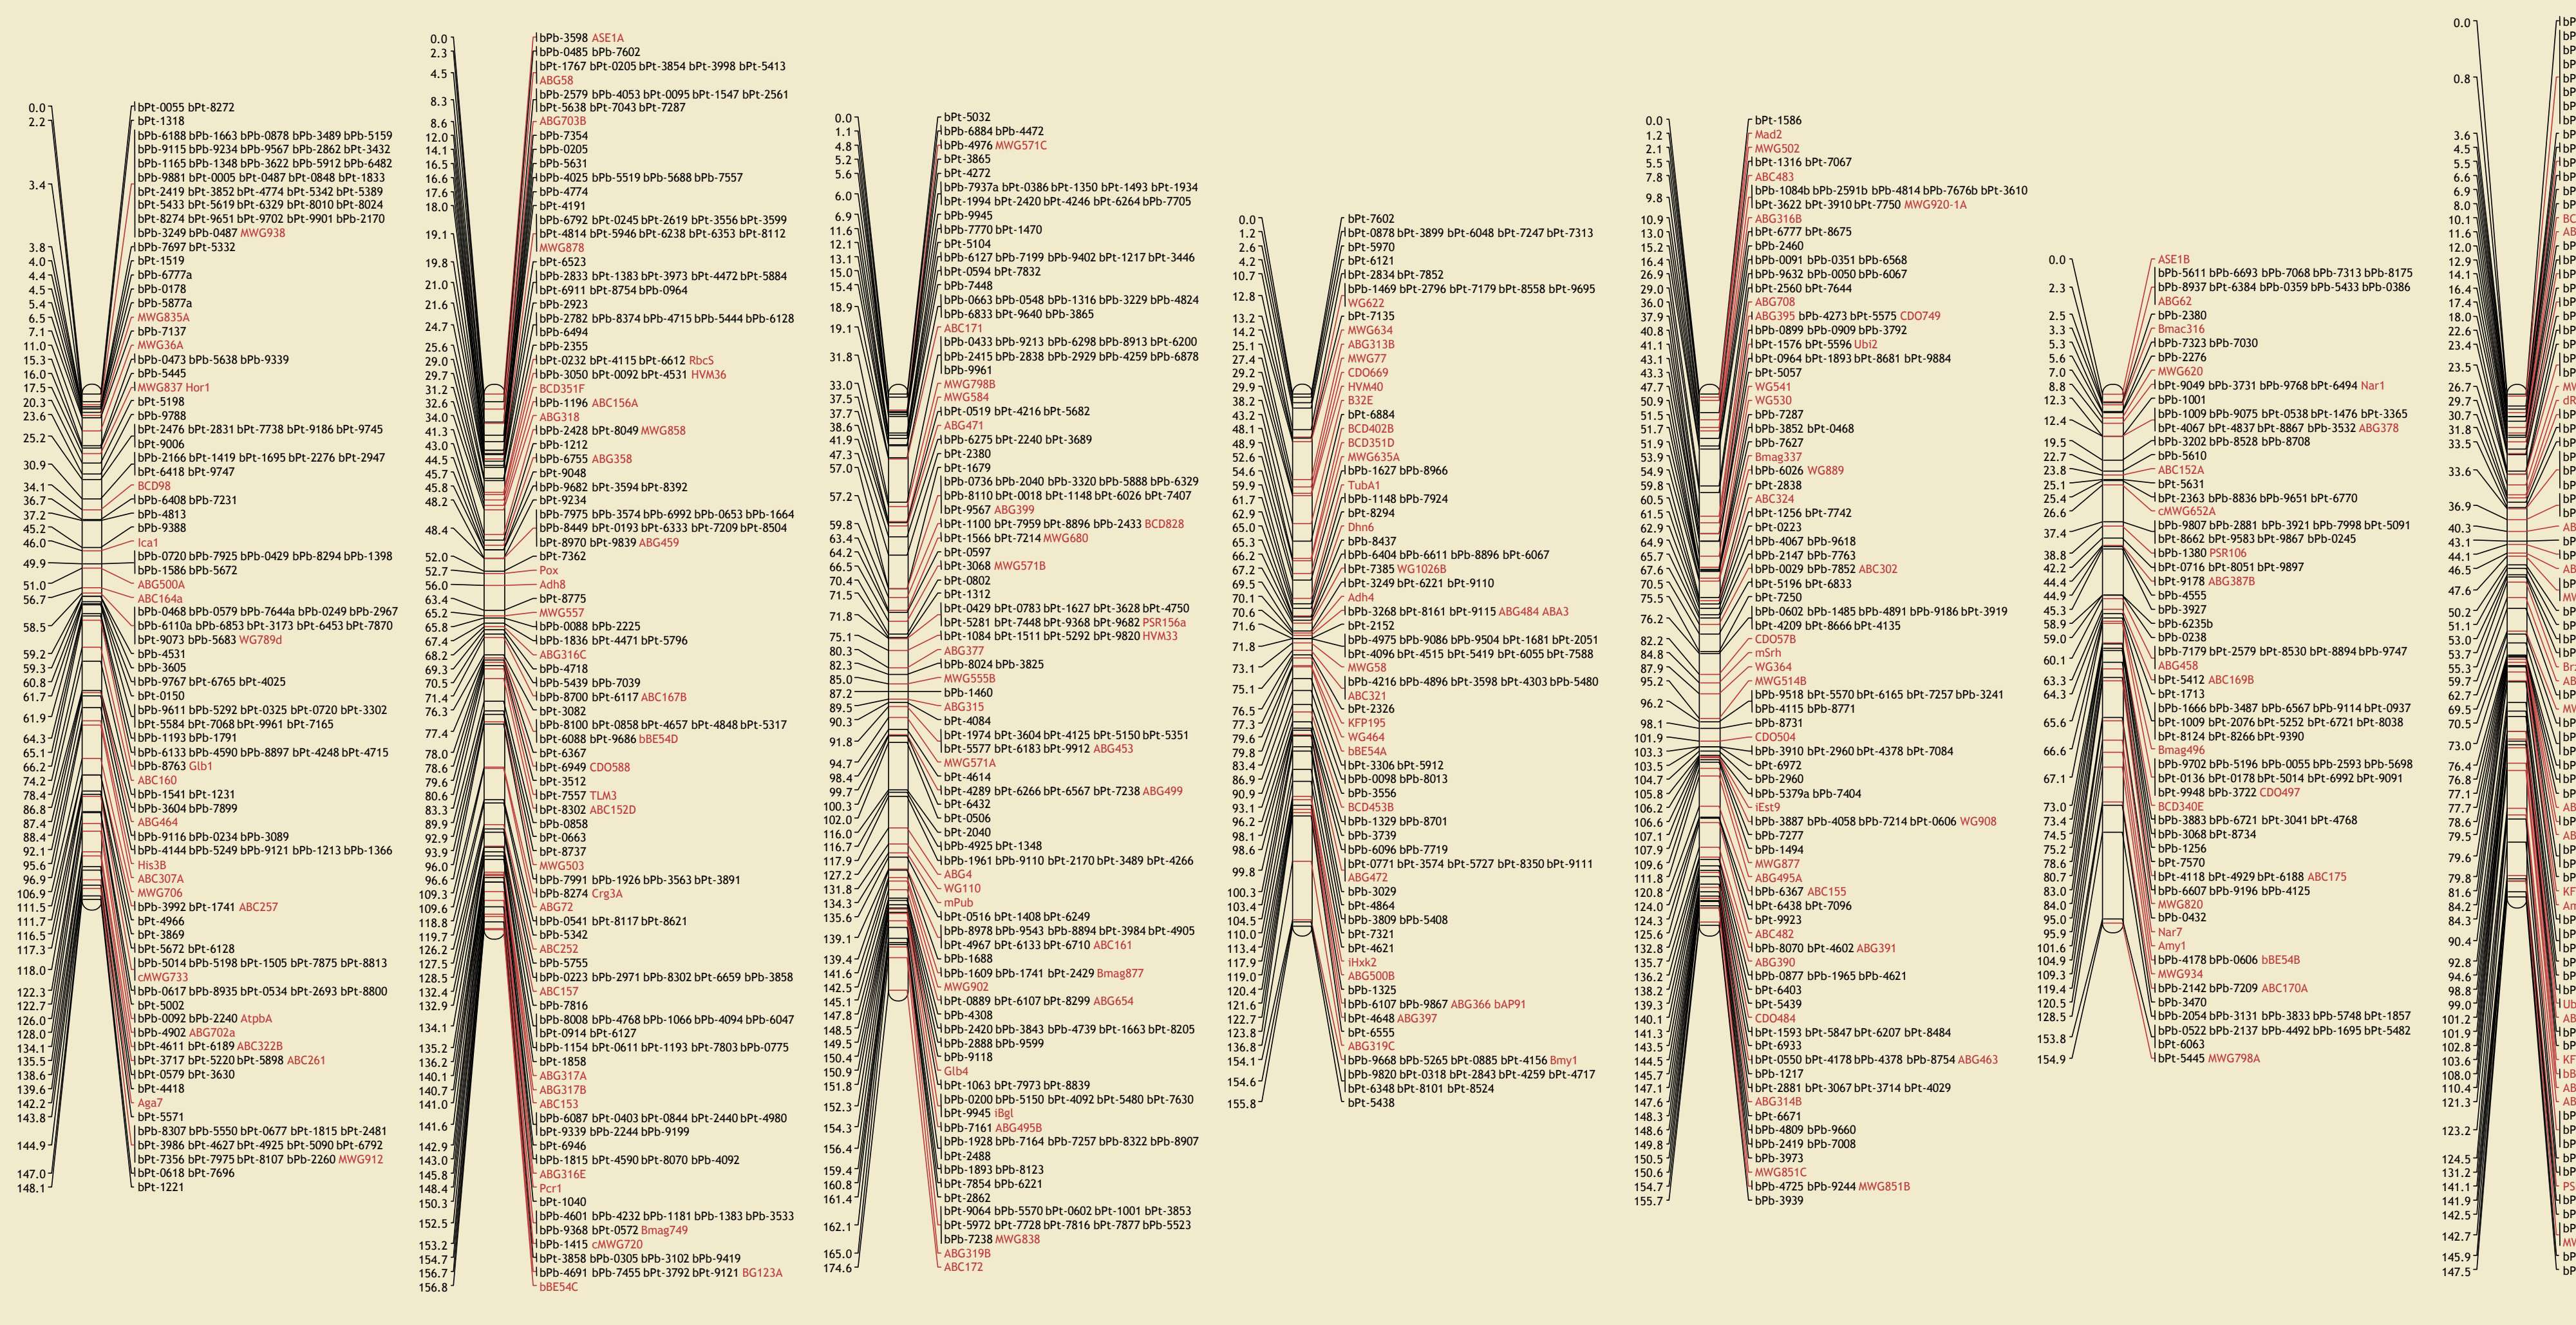

TX9425/Franklin

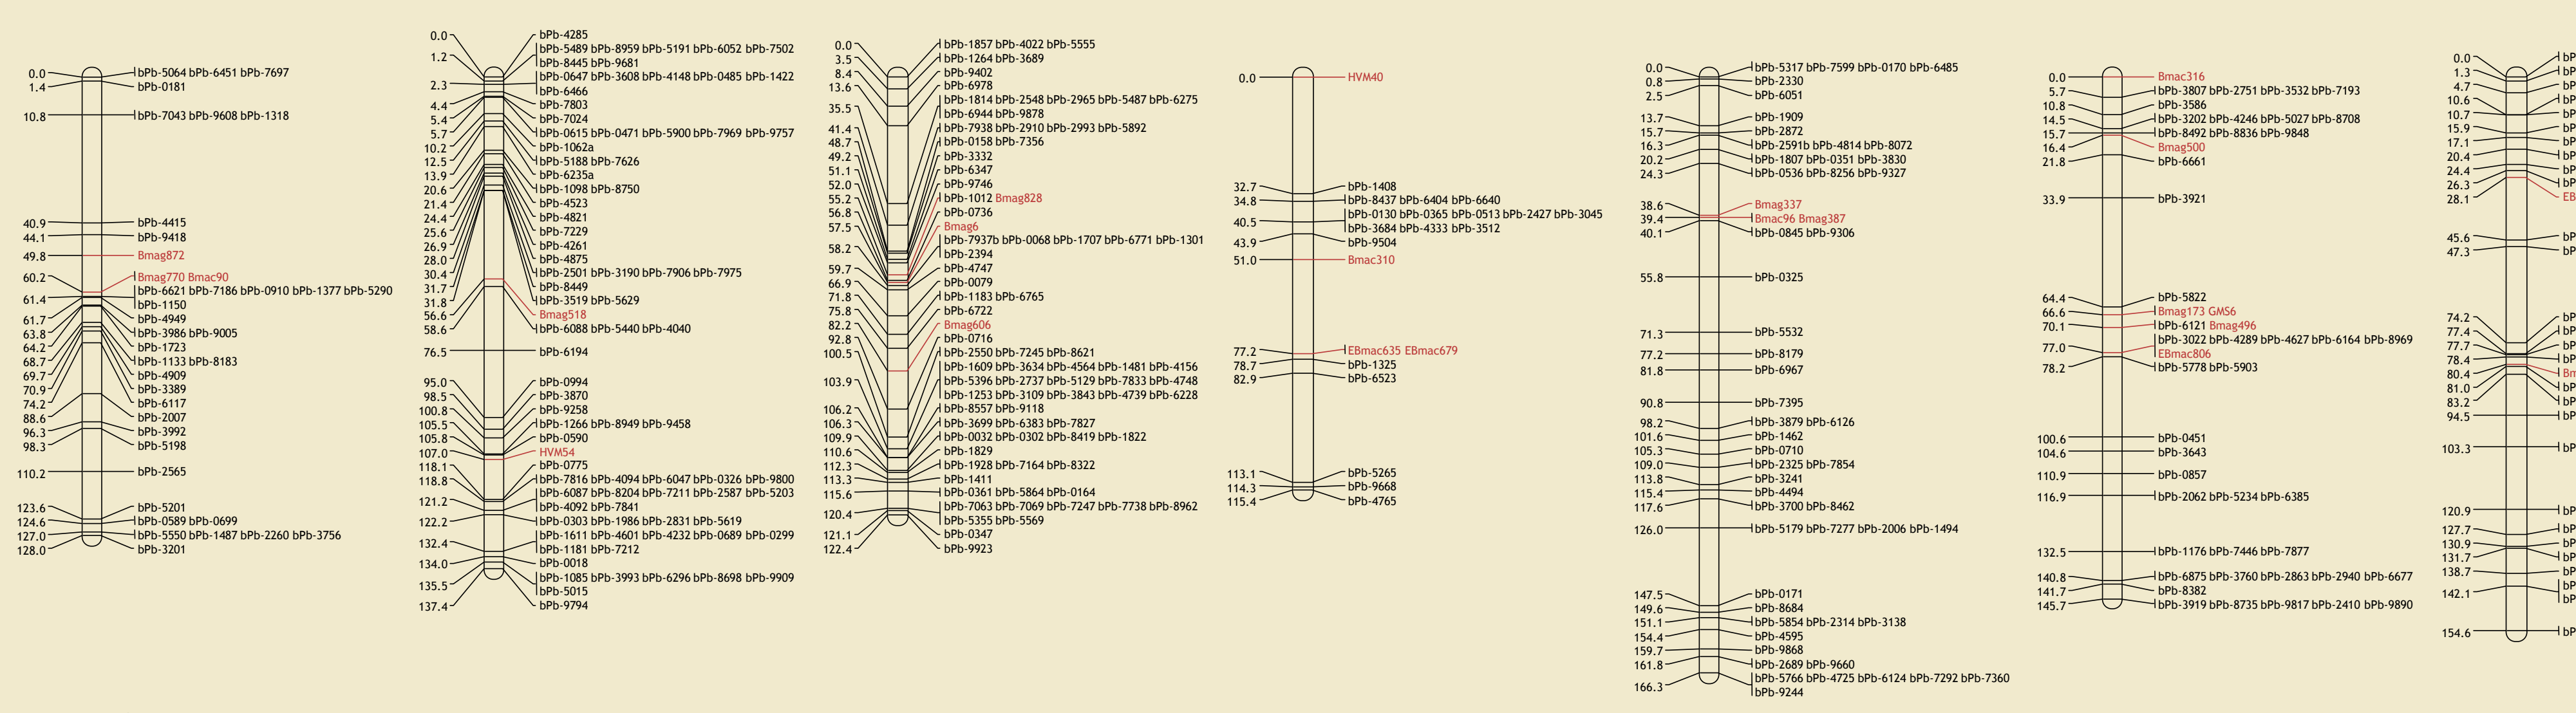

Yerong/Franklin

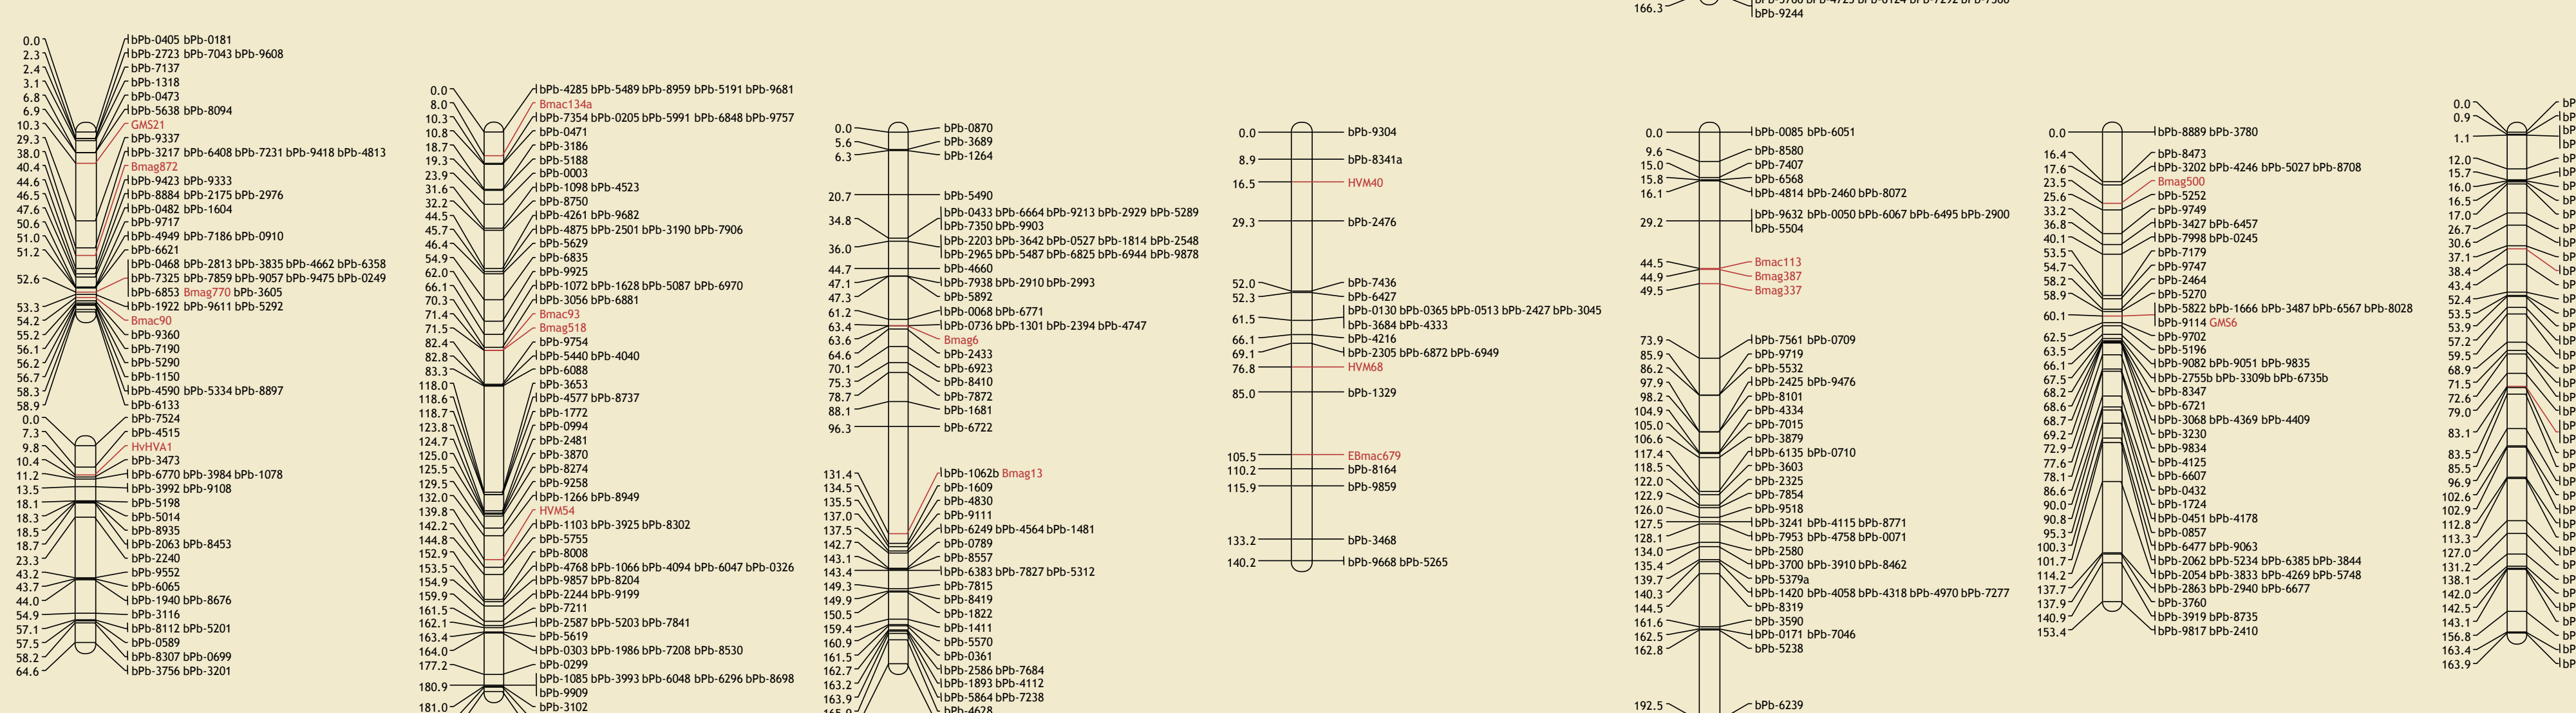

Black: DArT loci
Red: SSR, RFLP, STS loci
