# Supplementary material for: A high-density consensus map of barley linking DArT markers to SSR, RFLP and STS loci and agricultural traits
Source: PubMed Central journal article supplement (PMC1564146; doi:10.1186/1471-2164-7-206), 2006-08-12
Supplement: 1471-2164-7-206-S3.pdf [file 1471-2164-7-206-S3.pdf]

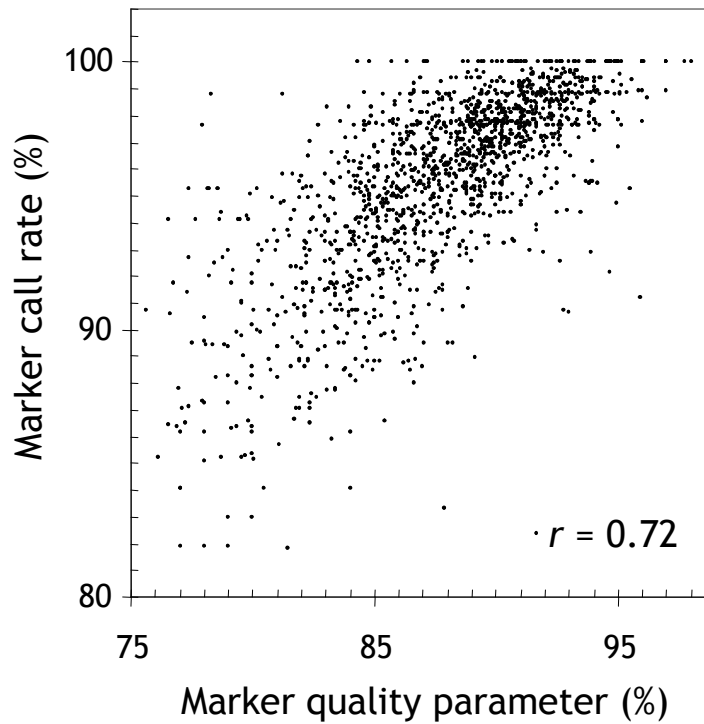

**Additional file 3: Relationship between DArT marker quality values and marker call rates.** The quality value of a marker is the between-allelic-states variance of the relative hybridization intensity as a percentage of the total variance of the relative hybridization intensity. Only the 'bPb' DArT markers from a *Pst*I/*Bst*NI representation were used to generate this graph.
