# Supplementary material for: A high-density consensus map of barley linking DArT markers to SSR, RFLP and STS loci and agricultural traits
Source: PubMed Central journal article supplement (PMC1564146; doi:10.1186/1471-2164-7-206), 2006-08-12
Supplement: 1471-2164-7-206-S7.pdf [file 1471-2164-7-206-S7.pdf]

### Additional File 7: Statistics of consensus map by chromosome.

Map features were calculated for the whole dataset and various subsets obtained by removing selected groups of loci while maintaining the locus order of the consensus map.

|                                                           | 1H      | 2H      | 3H      | 4H      | 5H      | 6H      | 7H      | Genome  |
|-----------------------------------------------------------|---------|---------|---------|---------|---------|---------|---------|---------|
| <b>Number of loci</b>                                     |         |         |         |         |         |         |         |         |
| All                                                       | 423     | 522     | 470     | 278     | 379     | 362     | 501     | 2,935   |
| DArT                                                      | 301     | 362     | 361     | 148     | 270     | 270     | 373     | 2,085   |
| ‘bPb’ DArT                                                | 212     | 276     | 255     | 91      | 213     | 219     | 280     | 1,546   |
| Others                                                    | 122     | 160     | 109     | 130     | 109     | 92      | 128     | 850     |
| <b>Number of bins<sup>a</sup></b>                         |         |         |         |         |         |         |         |         |
| All                                                       | 225     | 298     | 246     | 162     | 241     | 191     | 266     | 1,629   |
| DArT                                                      | 154     | 206     | 190     | 82      | 169     | 140     | 189     | 1,130   |
| ‘bPb’ DArT                                                | 130     | 178     | 158     | 58      | 143     | 127     | 165     | 959     |
| Others                                                    | 81      | 108     | 73      | 92      | 82      | 66      | 92      | 594     |
| <b>Average/median inter-bin distance (cM)<sup>a</sup></b> |         |         |         |         |         |         |         |         |
| All                                                       | 0.7/0.3 | 0.6/0.3 | 0.8/0.3 | 0.9/0.4 | 0.8/0.5 | 0.8/0.3 | 0.6/0.3 | 0.7/0.3 |
| DArT                                                      | 1.0/0.4 | 0.8/0.3 | 1.0/0.3 | 1.8/1.0 | 1.2/0.6 | 1.1/0.4 | 0.9/0.3 | 1.0/0.4 |
| ‘bPb’ DArT                                                | 1.2/0.4 | 0.9/0.4 | 1.7/0.3 | 2.4/1.3 | 1.4/0.7 | 1.2/0.4 | 1.0/0.3 | 1.2/0.4 |
| Others                                                    | 1.9/1.3 | 1.5/1.0 | 2.5/2.0 | 1.5/1.0 | 2.4/1.9 | 2.1/1.4 | 1.8/1.1 | 1.9/1.3 |
| <b>Map length (cM)</b>                                    |         |         |         |         |         |         |         |         |
| All                                                       | 151.9   | 166.7   | 184.6   | 148.6   | 194.2   | 147.1   | 165.4   | 1,159   |
| DArT                                                      | 151.1   | 164.9   | 184.6   | 148.6   | 193.2   | 147.1   | 165.0   | 1,155   |
| ‘bPb’ DArT                                                | 148.1   | 161.6   | 183.6   | 137.4   | 193.2   | 147.1   | 165.0   | 1,136   |
| Others                                                    | 151.9   | 163.3   | 180.0   | 132.3   | 193.5   | 137.5   | 164.4   | 1,123   |

<sup>a</sup> Segregation signatures were concatenated across populations and co-segregating loci were collapsed into bins (unique loci) based on a minimum of 50 overlapping genotype calls (see *Methods* section entitled “Construction of component maps”).
