# Supplementary material for: A high-density consensus map of barley linking DArT markers to SSR, RFLP and STS loci and agricultural traits
Source: PubMed Central journal article supplement (PMC1564146; doi:10.1186/1471-2164-7-206), 2006-08-12
Supplement: 1471-2164-7-206-S8.pdf [file 1471-2164-7-206-S8.pdf]

**Additional File 8: Multi-locus markers.**

| <b>No. loci mapped</b> | <b>DArT markers</b> | <b>Other markers</b> |
|------------------------|---------------------|----------------------|
| 2                      | 21                  | 48                   |
| 3                      | 1                   | 10                   |
| 4                      | 0                   | 6                    |
| 5                      | 0                   | 1                    |
| > 5                    | 0                   | 1                    |
