# Supplementary material for: A high-density consensus map of barley linking DArT markers to SSR, RFLP and STS loci and agricultural traits
Source: PubMed Central journal article supplement (PMC1564146; doi:10.1186/1471-2164-7-206), 2006-08-12
Supplement: 1471-2164-7-206-S10.pdf [file 1471-2164-7-206-S10.pdf]

**Additional File 10: Average number of 'bPb' DArT markers within 5 cM on either side of non-DArT markers previously identified to be associated with phenotypic traits.**

| <b>Number of linked 'bPb' DArT markers</b> |                                    |              |                                                       |
|--------------------------------------------|------------------------------------|--------------|-------------------------------------------------------|
| <b>Chromosome</b>                          | <b>Average <math>\pm</math> SD</b> | <b>Range</b> | <b>Number of trait-influencing loci on chromosome</b> |
| 1H                                         | 30 $\pm$ 11                        | 17 - 37      | 3                                                     |
| 2H                                         | 12 $\pm$ 6                         | 5 - 25       | 17                                                    |
| 3H                                         | 14 $\pm$ 9                         | 4 - 27       | 12                                                    |
| 4H                                         | 8 $\pm$ 8                          | 0 - 26       | 15                                                    |
| 5H                                         | 13 $\pm$ 4                         | 7 - 21       | 12                                                    |
| 6H                                         | 41                                 | 41           | 1                                                     |
| 7H                                         | 22 $\pm$ 10                        | 6 - 35       | 6                                                     |
