# Supplementary material for: A high-density consensus map of barley linking DArT markers to SSR, RFLP and STS loci and agricultural traits
Source: PubMed Central journal article supplement (PMC1564146; doi:10.1186/1471-2164-7-206), 2006-08-12

# Associations between 'bPb' DArT markers and agricultural traits

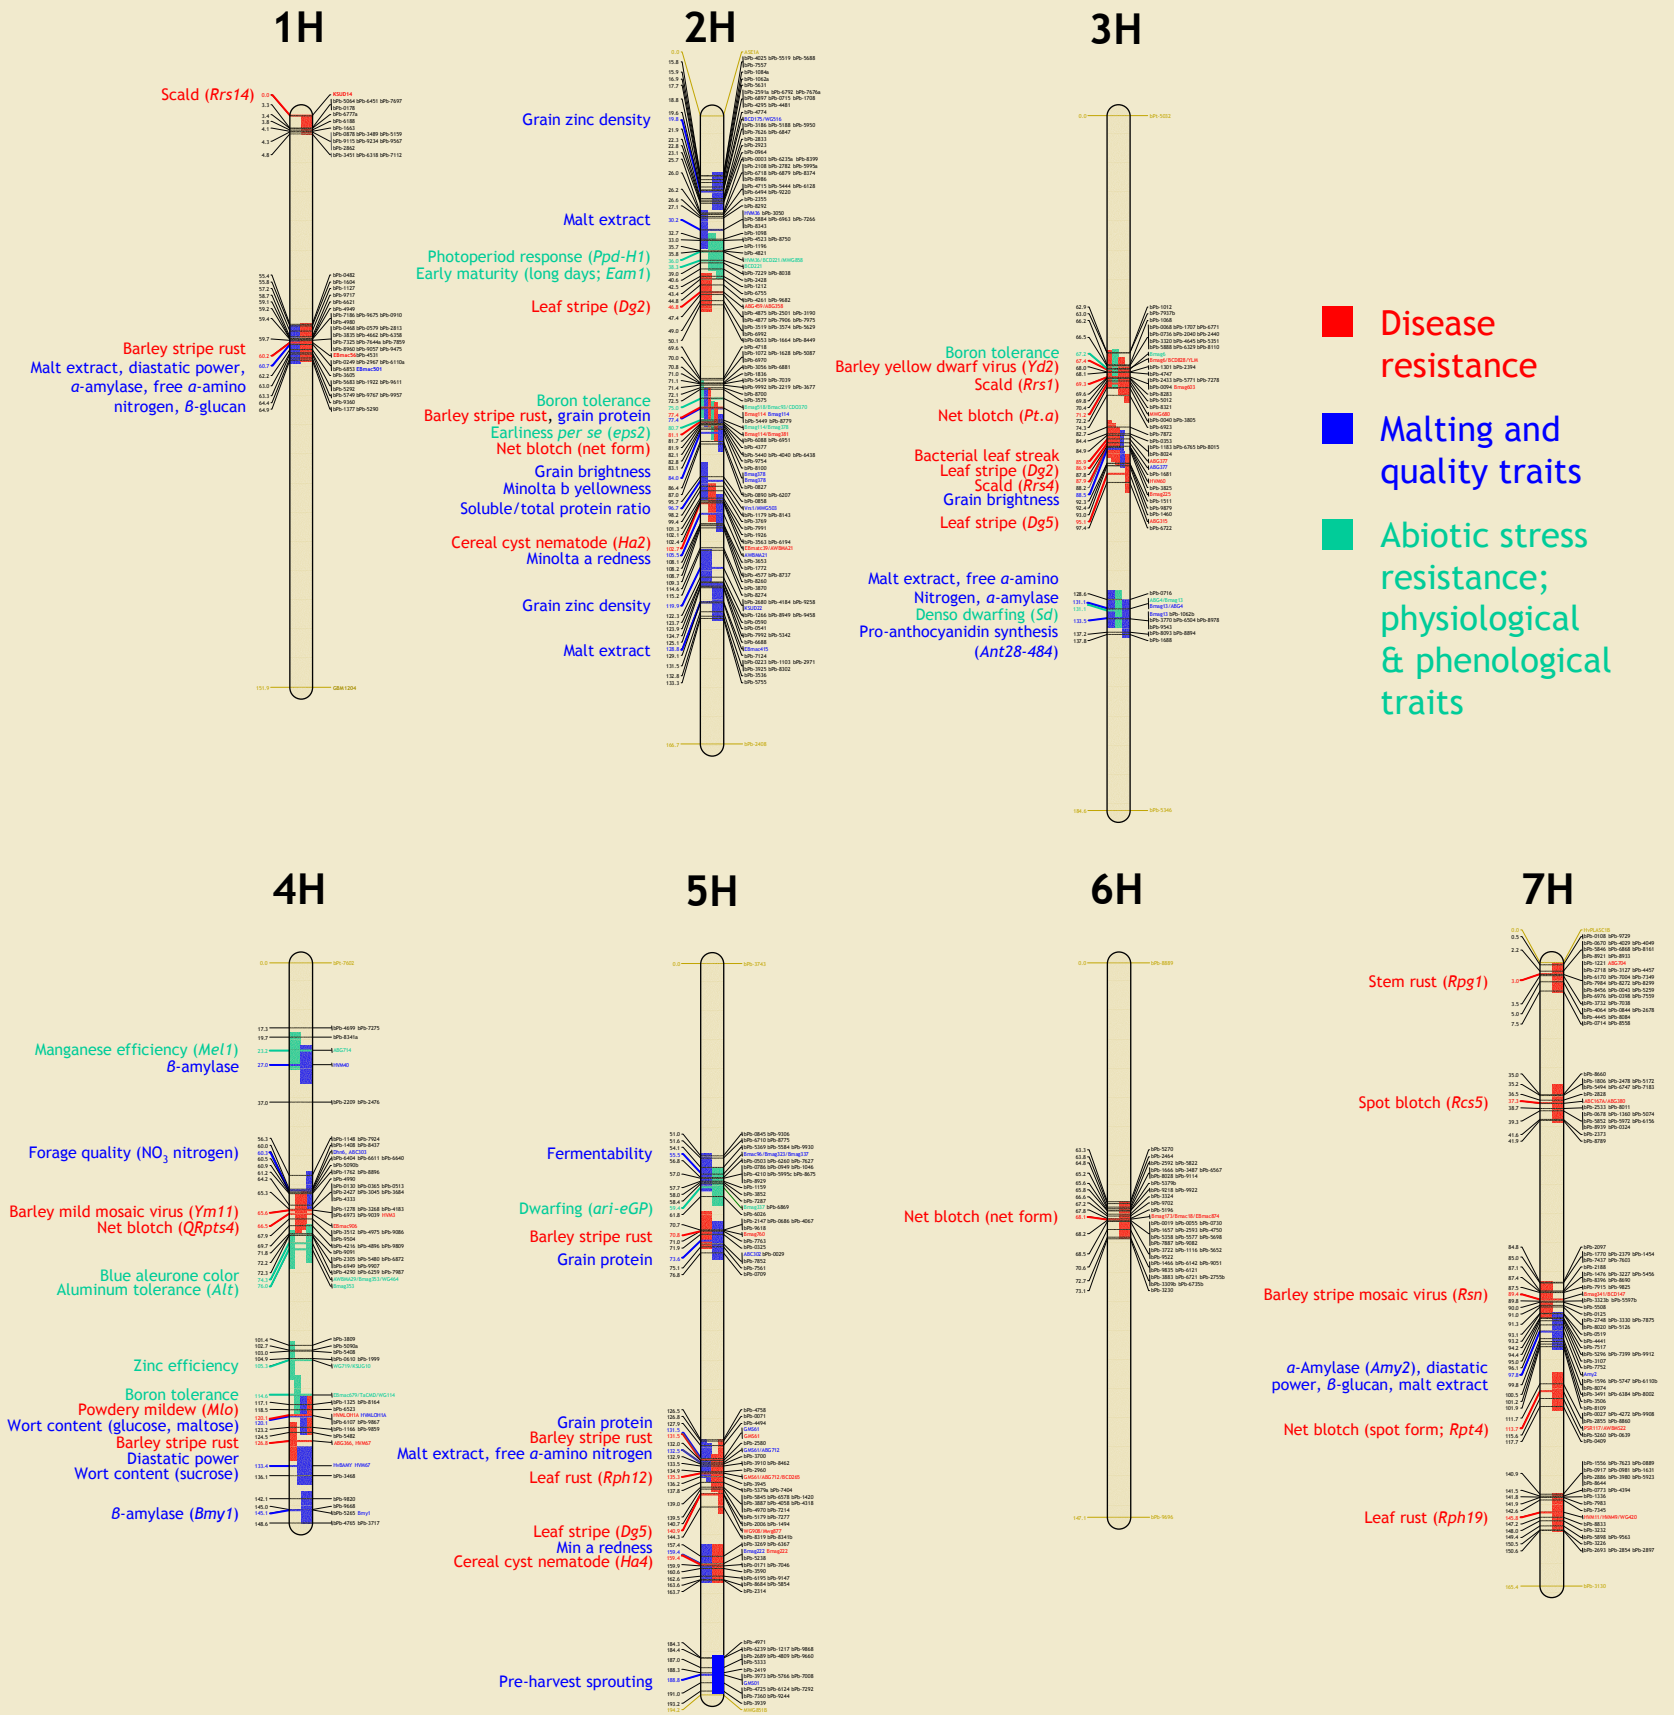

Supplement: 1471-2164-7-206-S12.pdf [file 1471-2164-7-206-S12.pdf]
